# Supplementary material for: Quantitative Evidence for the Dependence of Highly Crystalline Single Wall Carbon Nanotube Synthesis on the Growth Method
Source: MDPI journal article supplement (doi:10.3390/nano11123461), 2021-12-20
Supplement: s1 [file s1]

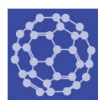

## Supplementary Materials

# Quantitative Evidence for the Dependence of Highly Crystalline Single Wall Carbon Nanotube Synthesis on the Growth Method

Takashi Tsuji <sup>1,†</sup>, Guohai Chen <sup>1,†</sup>, Takahiro Morimoto <sup>1</sup>, Yoshiki Shimizu <sup>2,3</sup>, Jaeho Kim <sup>4</sup>, Hajime Sakakita <sup>4</sup>, Kenji Hata <sup>1</sup>, Shunsuke Sakurai <sup>1,\*</sup>, Kazufumi Kobashi <sup>1,\*</sup> and Don N. Futaba <sup>1</sup>

<sup>1</sup> CNT-Application Research Center, National Institute of Advanced Industrial Science and Technology (AIST), Tsukuba 305-8565, Japan; takashi.tsuji@aist.go.jp (T.T.); guohai-chen@aist.go.jp (G.C.); t-morimoto@aist.go.jp (T.M.); kenji-hata@aist.go.jp (K.H.); d-futaba@aist.go.jp (D.N.F.)

<sup>2</sup> Nanomaterials Research Institute, National Institute of Advanced Industrial Science and Technology (AIST), Tsukuba 305-8565, Japan; shimizu.yoshiki@aist.go.jp

<sup>3</sup> AIST-UTokyo Advanced Operando-Measurement Technology Open Innovation Laboratory (OPERANDO-OIL), National Institute of Advanced Industrial Science and Technology (AIST), Kashiwa 227-8589, Japan

<sup>4</sup> Innovative Plasma Processing Group, Research Institute for Advanced Electronics and Photonics, National Institute of Advanced Industrial Science and Technology (AIST), Tsukuba 305-8568, Japan; jaeho.kim@aist.go.jp (J.K.); h.sakakita@aist.go.jp (H.S.)

\* Correspondence: shunsuke-sakurai@aist.go.jp (S.S.); kobashi-kazufumi@aist.go.jp (K.K.)

† These authors contributed equally to this work.

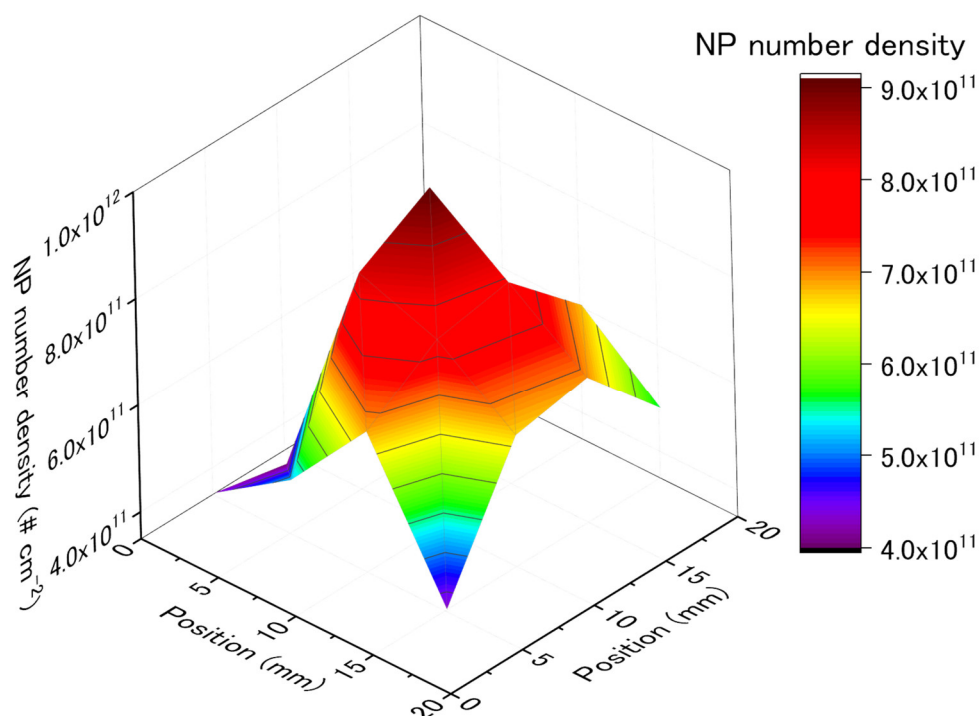

**Figure S1.** Spatial distribution of number density of nanoparticles (NPs) on the 20 mm × 20 mm substrate measured by SEM images of the catalysts.
